# Supplementary material for: Interaction of MRPL9 and GGCT Promotes Cell Proliferation and Migration by Activating the MAPK/ERK Pathway in Papillary Thyroid Cancer
Source: MDPI journal article supplement (doi:10.3390/ijms231911989), 2022-10-09
Supplement: s1 [file s1]

# Interaction of MRPL9 and GGCT Promotes Cell Proliferation and Migration by Activating the MAPK/ERK Pathway in Papillary Thyroid Cancer

Hui-Min Zhang <sup>1,†</sup>, Zi-Yi Li <sup>1,†</sup>, Zhou-Tong Dai <sup>1,2</sup>, Jun Wang <sup>1</sup>, Le-Wei Li <sup>1</sup>, Qi-Bei Zong <sup>1</sup>, Jia-Peng Li <sup>1</sup>, Tong-Cun Zhang <sup>1,\*</sup> and Xing-Hua Liao <sup>1,\*</sup>

<sup>1</sup> Institute of Biology and Medicine, College of Life and Health Sciences, Wuhan University of Science and Technology, Wuhan 430070, China; huiminzhang@wust.edu.cn (H.-M.Z.); lzy954599@126.com (Z.-Y.L.); zhoutongdai@126.com (Z.-T.D.); 201818703005@wust.edu.cn (J.W.); leweili@wust.edu.cn (L.-W.L.); qibeizong@wust.edu.cn (Q.-B.Z.); jiapengli@wust.edu.cn (J.-P.L.)

<sup>2</sup> Department of Obstetrics and Gynecology, Tongji Hospital, Tongji Medical College, Huazhong University of Science and Technology, Wuhan 430030, China

\* Correspondence: zhangtongcun@wust.edu.cn (T.-C.Z.); xinghualiao@wust.edu.cn (X.-H.L.)

† These authors contributed equally to this work.

## Supplementary Material

Table S1. Base sequence information.

| Name                      | Sequence of bases      | product size<br>(bp) |
|---------------------------|------------------------|----------------------|
| qPCR-GGCT-forward primer  | TGGCAATTCCCAAGGCAAAAC  | 140                  |
| qPCR-GGCT-reverse primer  | CCCCTTCTTGCTCATCCAGAG  |                      |
| qPCR-MRPL9-forward primer | GTTACCAGAAGAGCCTATCACA |                      |
| qPCR-MRPL9-reverse primer | C                      | 77                   |
|                           | CTCTCACAGTATCAAGCCCATT |                      |
| qPCR-Actin-forward primer | T                      | 250                  |
|                           | CATGTACGTTGCTATCCAGGC  |                      |
| qPCR-Actin-reverse primer | CTCCTTAATGTCACGCACGAT  | 567                  |
| PCR-GGCT-forward primer   | ATGGCCAACTCGGGCTGC     |                      |
| PCR-GGCT-reverse primer   | CTAAAGAGTTTGTGTTTCCCCC |                      |
| PCR-MRPL9-forward primer  | TTT                    | 804                  |
|                           | ATGGCGGCGCCCGTTGTCA    |                      |
| PCR-MRPL9-reverse primer  | TTAGATCTGGGGGCTGGTGGGG | G                    |
| shGGCT                    | GCTGGAGTATCAAGAGAAGTT  |                      |
| shMRPL9                   | GTGACCTGGTCTCAGTGAA    |                      |

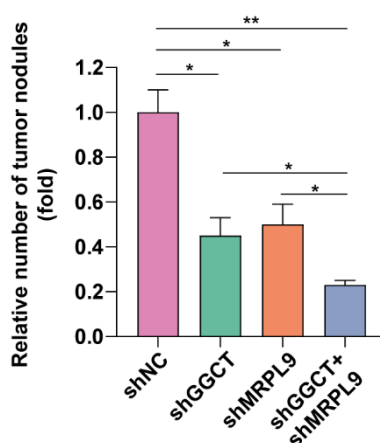

Figure S1. HE staining was performed on the lung tissue of nude mice, and the lung tumor nodules were counted ( $n=3$ ). One-way analysis of variance (ANOVA) was used with Tukey's post hoc test. “\*” represents  $P \leq 0.05$ , “\*\*” represents  $P \leq 0.01$ .
